# Supplementary material for: Development of HDAC Inhibitors Exhibiting Therapeutic Potential in T-Cell Prolymphocytic Leukemia
Source: PubMed Central journal article supplement (PMC8237267; doi:10.1021/acs.jmedchem.1c00420), 2021-06-08

# Supporting Information

## Development of HDAC Inhibitors Exhibiting Therapeutic Potential in T-cell Prolymphocytic Leukemia

Krimo Toutah<sup>1,#</sup>, Nabanita Nawar<sup>1,2,#</sup>, Sanna Timonen<sup>3,4,5</sup>, Helena Sorger<sup>6</sup>, Yasir S. Raouf<sup>1,2</sup>, Shazreh Bukhari<sup>1,2</sup>, Jana von Jan<sup>7,8,9</sup>, Aleksandr Ianevski<sup>5</sup>, Justyna M. Gawel<sup>1</sup>, Olasunkanmi O. Olaoye<sup>1,2</sup>, Mulu Geletu<sup>1</sup>, Ayah Abdeldayem<sup>1,2</sup>, Johan Israelian<sup>1,2</sup>, Tudor B. Radu<sup>1,2</sup>, Abootaleb Sedighi<sup>1</sup>, Muzaffar N. Bhatti<sup>1</sup>, Muhammad M. Hassan<sup>1,2</sup>, Pimyupa Manaswiyoungkul<sup>1,2</sup>, Andrew E. Shouksmith<sup>1</sup>, Heidi A. Neubauer<sup>6</sup>, Elvin D. de Araujo<sup>12</sup>, Tero Aittokallio<sup>5,10,11</sup>, Oliver H. Krämer<sup>13</sup>, Richard Moriggl<sup>6\*</sup>, Satu Mustjoki<sup>3,4,14\*</sup>, Marco Herling<sup>7,8,9\*</sup>, Patrick T. Gunning<sup>1,2,12\*</sup>

# These authors contributed equally

<sup>1</sup>Department of Chemical and Physical Sciences, University of Toronto Mississauga, 3359 Mississauga Road, Mississauga, Ontario, L5L 1C6, Canada

<sup>2</sup>Department of Chemistry, University of Toronto, 80 St. George Street, Toronto, Ontario M5S 3H6, Canada

<sup>3</sup>Hematology Research Unit Helsinki, Helsinki University Hospital Comprehensive Cancer Center, Helsinki, Finland

<sup>4</sup>Translational Immunology Research Program and Department of Clinical Chemistry and Hematology, University of Helsinki, Helsinki, Finland

<sup>5</sup>Institute for Molecular Medicine Finland (FIMM), HiLIFE, University of Helsinki, Helsinki, Finland

<sup>6</sup>Institute of Animal Breeding and Genetics, University of Veterinary Medicine Vienna, Vienna, Austria

<sup>7</sup>Department of Internal Medicine, Center for Integrated Oncology Aachen-Bonn-Cologne-Duesseldorf (CIO ABCD), University of Cologne (UoC), Cologne, Germany

<sup>8</sup>Excellence Cluster for Cellular Stress Response and Aging-Associated Diseases (CECAD), UoC, Cologne, Germany

<sup>9</sup>Center for Molecular Medicine Cologne (CMMC), UoC, Cologne, Germany

<sup>10</sup>Department of Cancer Genetics, Institute for Cancer Research, Oslo University Hospital, Oslo, Norway

<sup>11</sup>Oslo Centre for Biostatistics and Epidemiology, University of Oslo, Oslo, Norway

<sup>12</sup>Centre for Medicinal Chemistry, University of Toronto Mississauga, 3359 Mississauga Road, Mississauga, Ontario, L5L 1C6, Canada

<sup>13</sup>Department of Toxicology, University Medical Center, 55131 Mainz, Germany

<sup>14</sup>iCAN Digital Precision Cancer Medicine Flagship, Helsinki, Finland

### Table of Contents

|                                                                                                                                    |          |
|------------------------------------------------------------------------------------------------------------------------------------|----------|
| <b>Fig. S1. Examples of validated HDAC inhibitors in literature.....</b>                                                           | <b>2</b> |
| <b>Fig S2. In vitro IC<sub>50</sub> values of 5 and 14 (KT-531) for a range of preincubation times.....</b>                        | <b>2</b> |
| <b>Fig S3. K<sub>on</sub> experiment to determine kinetic parameters of time-dependent inhibition of compound 14 (KT-531).....</b> | <b>3</b> |
| <b>Fig. S4. Ramachandran plot outputs of human HDAC6, HDAC8 .....</b>                                                              | <b>3</b> |
| <b>Fig. S5. In silico docking binding pose of 14 (KT-531) and 13 in human HDAC6.....</b>                                           | <b>4</b> |
| <b>Fig. S6. Flow cytometry data .....</b>                                                                                          | <b>4</b> |
| <b>Fig. S7. Cleavage of Caspase 3 and PARP-1 upon dose-escalation of citarinstat.....</b>                                          | <b>4</b> |
| <b>Fig S9. In vivo PK parameters of 14.....</b>                                                                                    | <b>5</b> |
| <b>Table S1a. Stability of selected compounds towards glutathione (GSH). .....</b>                                                 | <b>6</b> |

Table S1b. Stability of 5 and 12 in hepatocytes..... 6

Table S2a. Stability of 6 and 14 (KT-531) in mouse plasma..... 6

Table S2b. In vitro and in cellulo activity of Nexturastat..... 6

Table S3.  $K_{off}$  kinetic parameters ..... 6

Table S4. Cytotoxicity of SAHA and belinostat in healthy non-cancerous cell lines ..... 7

Table S5 Comparison of HDAC8 selective inhibitors (PCI-34051 and MMH-410) with KT-531..... 7

<sup>1</sup>H NMR spectra and Analytical HPLC traces ..... 7

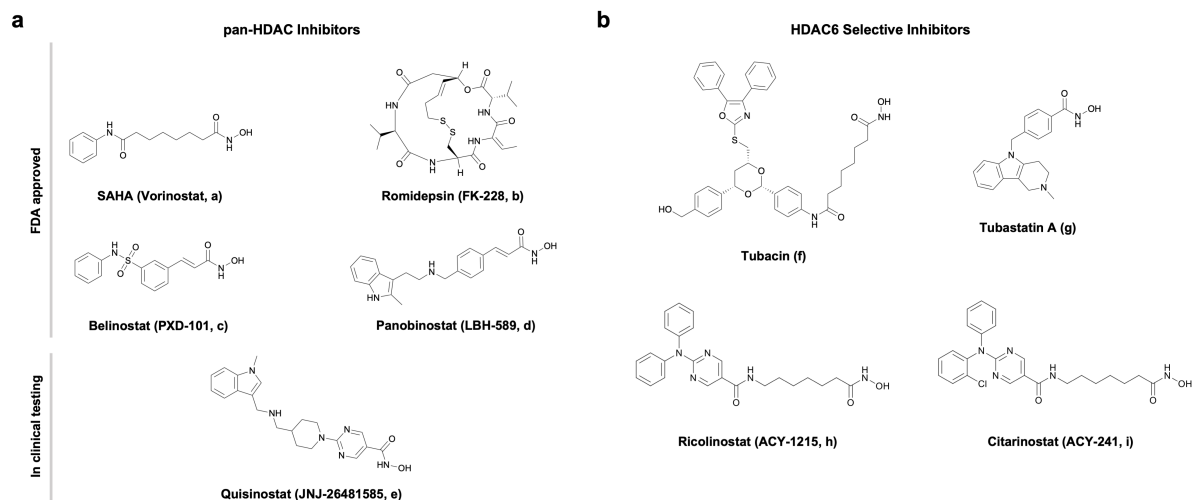

**Fig. S1. Examples of validated HDAC inhibitors in literature. a** Selected pan-HDAC inhibitors (a-e). a-d are FDA approved. **b** HDAC6-selective inhibitors (f-i).

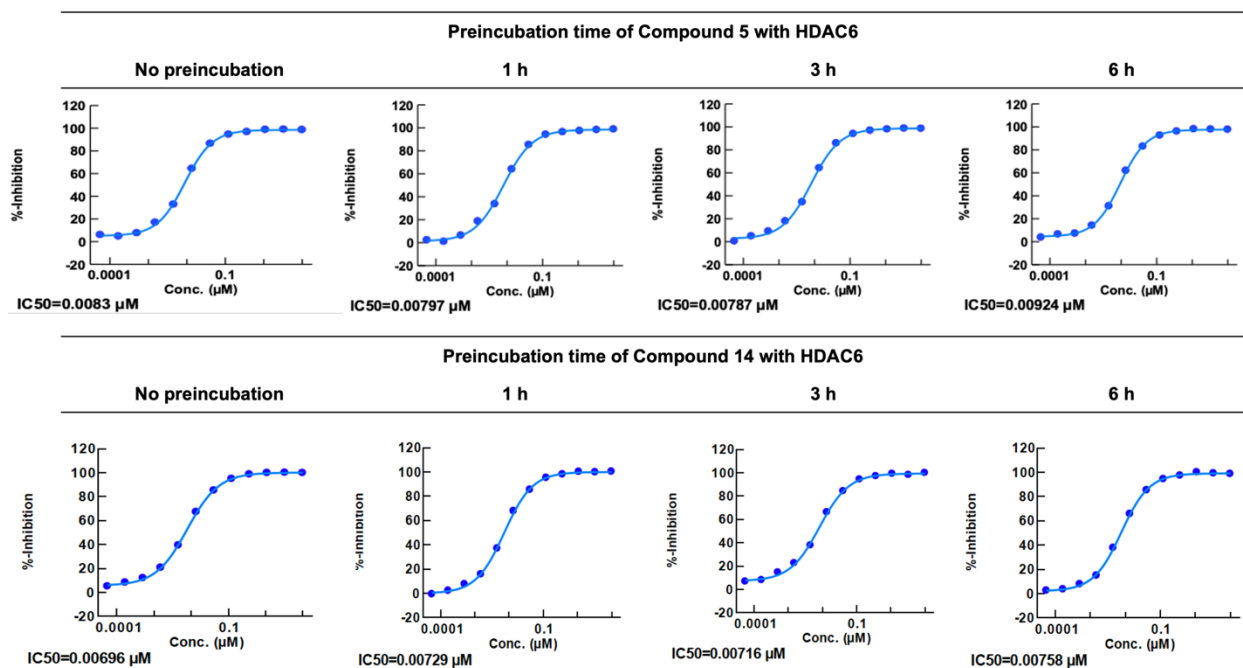

**Fig S2. In vitro IC<sub>50</sub> values of 5 and 14 (KT-531) for a range of preincubation times (0, 1, 3 and 6 h) with HDAC6.**

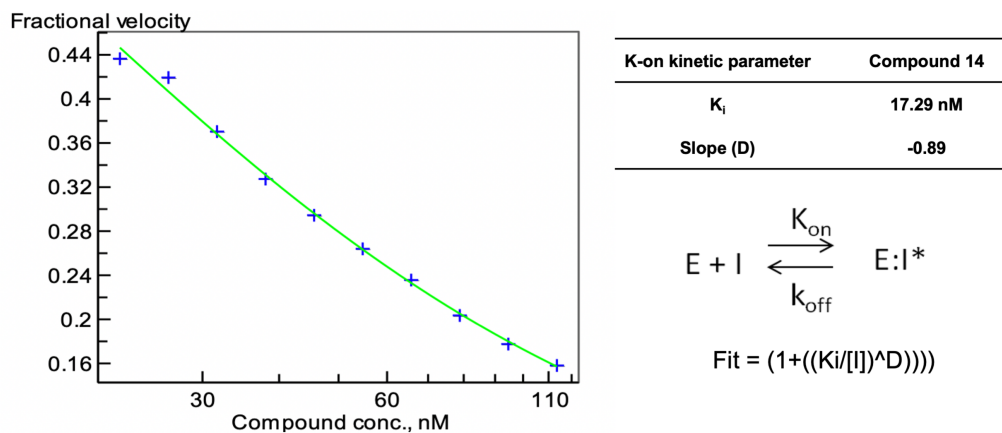

Fig S3.  $K_{on}$  experiment to determine kinetic parameters of time-dependent inhibition of compound 14 (KT-531).

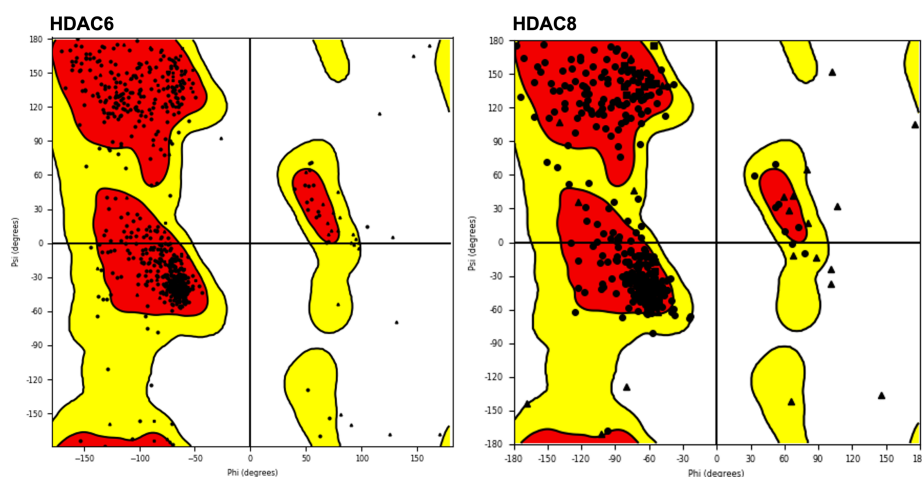

Fig. S4. Ramachandran plot outputs of human HDAC6, HDAC8 (PDB 5EDU, 1T64 respectively) post protein-preparation. As expected, due to their structural flexibility, only Gly and Ala residues were found to occupy the disfavoured region (quadrant IV, bottom right). No other sterically forbidden angles were observed.

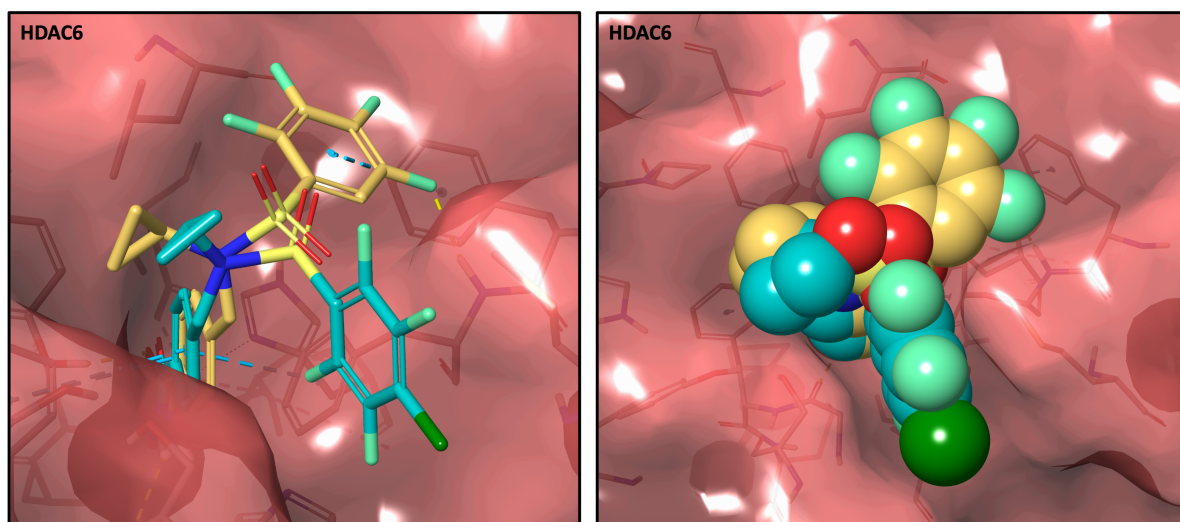

**Fig. S5.** *In silico* docking binding pose of **14** (KT-531) and **13** in human HDAC6 (PDB 5EDU), hydrogen-bonds (yellow-dashed line),  $\pi$ - $\pi$  stacking (blue-dashed line) KT-531 (C, yellow); **13** (C, blue-green) (N, blue; O, red; C, green; F, blue-green). The binding poses of each represent the difference in their conformation and interacting residues.

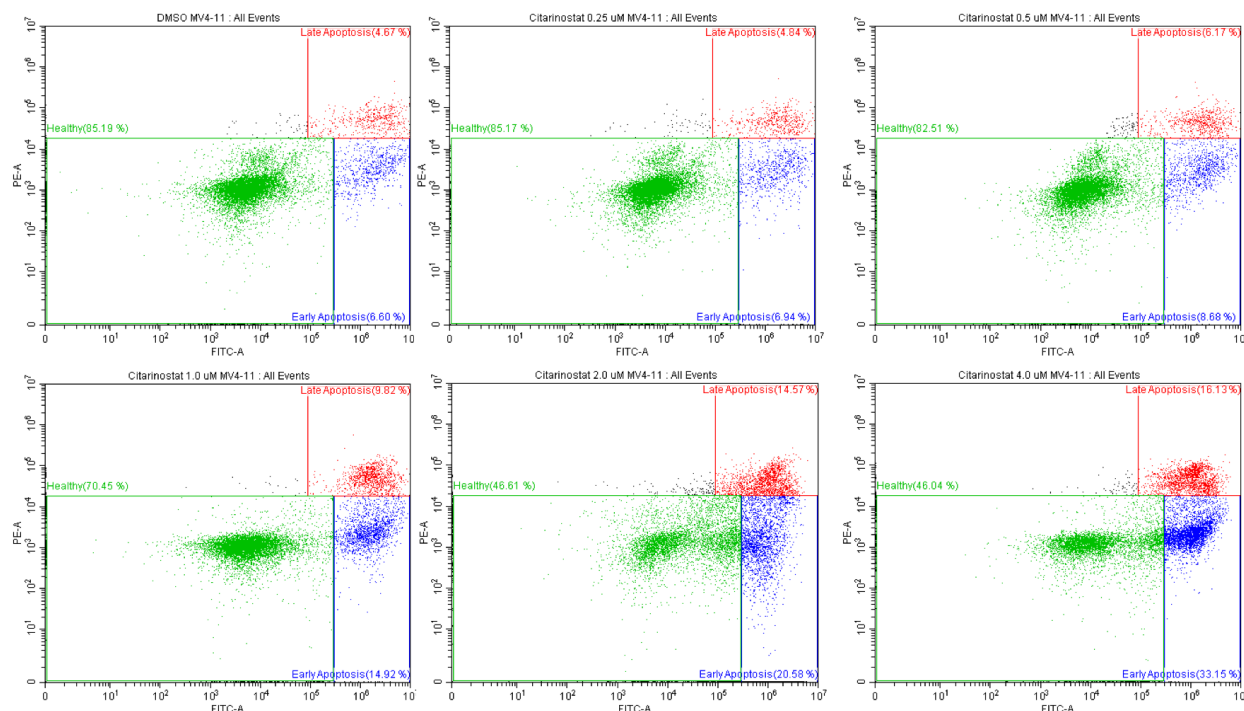

**Fig. S6.** Flow cytometry data of MV4-11 cells treated with increasing concentrations of citarinstat for 18 h and analyzed for apoptosis via Annexin V/PI staining. Representative dot blots from three independent experiments are presented.

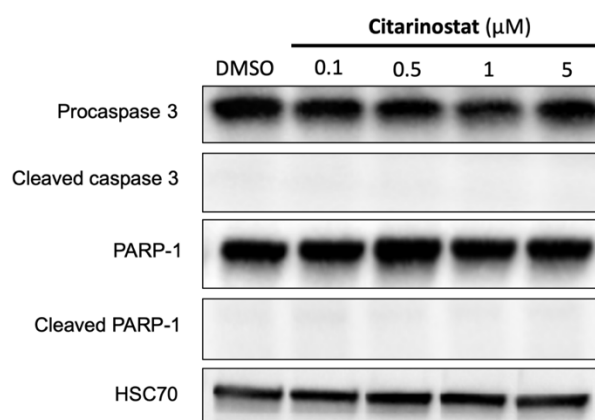

**Fig. S7.** Cleavage of Caspase 3 and PARP-1 upon dose-escalation of citarinstat for 6 h in MV4-11 cells. Protein extracts were prepared and subjected to SDS-PAGE and immunoblotting with Procaspase 3, cleaved Caspase-3, PARP-1, cleaved PARP-1, and HSC70 antibodies. A representative Western blot of three independent experiments is shown.

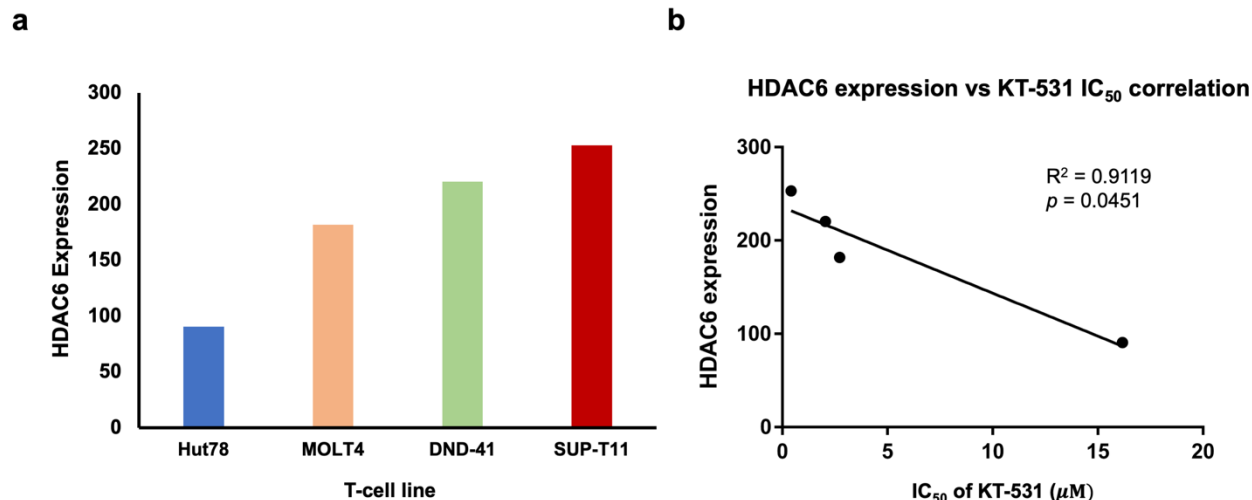

**Fig. S8.** **a.** Publicly available HDAC6 mRNA expression levels of available PTCL and T-ALL model cell lines (data from the Cancer Cell Line Encyclopedia, obtained via the Betastasis web portal). SUP-T11, a quasi-model of T-PLL showed the highest HDAC6 level. **b.** Correlation (linear regression model) of HDAC6 expression levels in cells with their sensitivity to **KT-531** (IC<sub>50</sub> values).

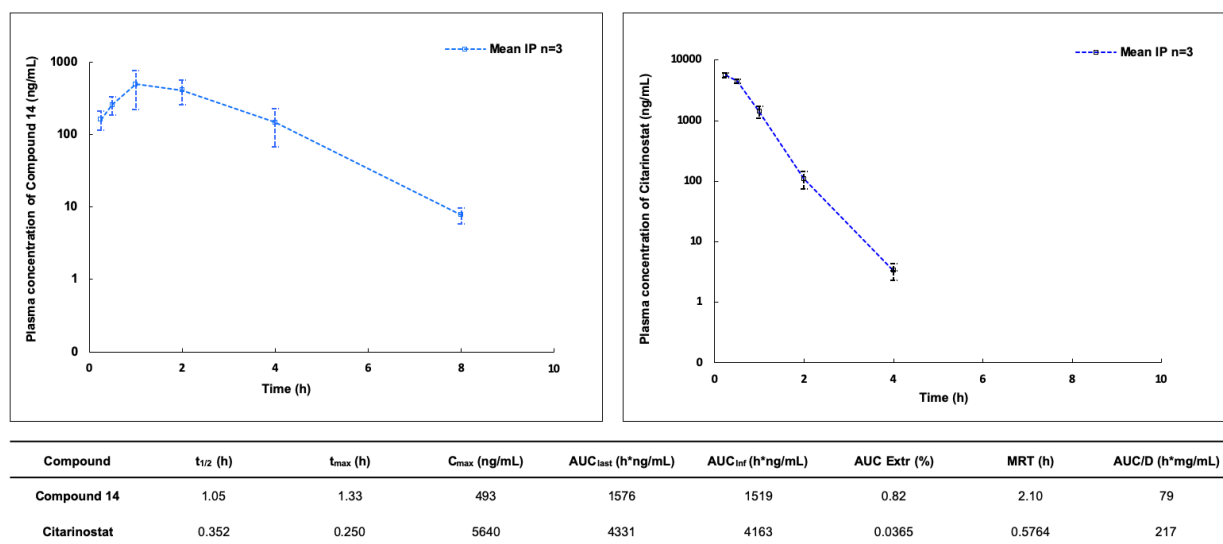

**Fig S9.** *In vivo* PK parameters of **14 (KT-531)** and citarinostat in male CD-1 mice (n=3) via IP (20mg/kg).

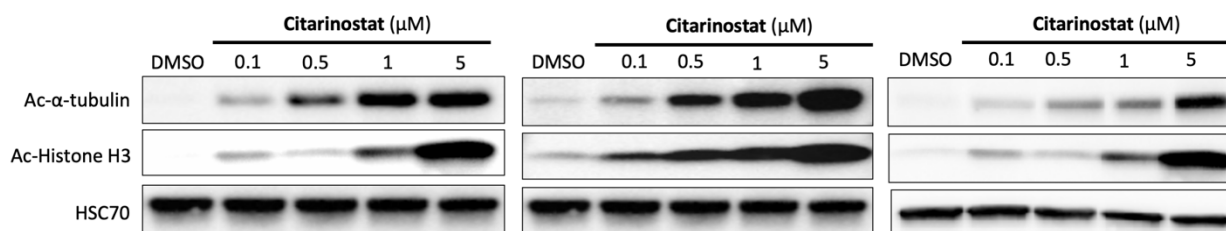

**Fig. S10.** Western blot illustrating  $\alpha$ -tubulin acetylation and histone H3 acetylation levels in MV4-11 AML cells following 6 h treatment with varying concentrations of clinical candidate citarinostat. Protein extracts were prepared, resolved by SDS-PAGE and immunoblotted with acetylated  $\alpha$ -tubulin, acetylated histone H3, and HSC70 antibodies.

**Table S1a.** Stability of selected compounds towards glutathione (GSH).

| <i>In vitro</i> Stability (GSH) |                 |
|---------------------------------|-----------------|
| Compound                        | $t_{1/2}$ (min) |
| 3                               | 106.33          |
| 4                               | 222.52          |
| 6                               | $\infty$        |
| 12                              | $\infty$        |
| 14 (KT-531)                     | $\infty$        |

**Table S1b.** Stability of 5 and 12 in hepatocytes.

| <i>In vitro</i> Stability in hepatocytes |         |                 |                                                   |
|------------------------------------------|---------|-----------------|---------------------------------------------------|
| Compound                                 | Species | $T_{1/2}$ (min) | $CL_{int}$ ( $\mu\text{L}/\text{min}/10^6$ cells) |
| 5                                        | Mouse   | <2.26           | >614.02                                           |
|                                          | Human   | $3.84 \pm 0.01$ | $361.41 \pm 1.85$                                 |
| 12                                       | Mouse   | $5.08 \pm 0.03$ | $272.65 \pm 1.92$                                 |

**Table S2a.** Stability of 6 and 14 (KT-531) in mouse plasma.

| Compound | Species | Remaining Percentages (%) |        |        |        |        |         | Half-life (min) |
|----------|---------|---------------------------|--------|--------|--------|--------|---------|-----------------|
|          |         | 0 min                     | 15 min | 30 min | 45 min | 60 min | 120 min |                 |
| 6        | Mouse   | 100                       | 67.8   | 32.7   | 44.5   | 19.7   | 3.4     | 25              |
| 14       | Mouse   | 100                       | 38.5   | 15.7   | 9.1    | 9.3    | 9.8     | 41              |

**Table S2b.** *In vitro* and *in cellulo* activity of Nexturastat.

| Compound    | <i>In vitro</i> $IC_{50}$ ( $\mu\text{M}$ ) |         |       |        | HDAC6 fold-selectivity | <i>In cellulo</i> $IC_{50}$ ( $\mu\text{M}$ ) |
|-------------|---------------------------------------------|---------|-------|--------|------------------------|-----------------------------------------------|
|             | HDAC3                                       | HDAC6   | HDAC8 | HDAC11 |                        |                                               |
| 14 (KT-531) | >1                                          | 0.00850 | 0.334 | >1     | 39.29                  | 0.42                                          |
| Nexturastat | 0.238                                       | 0.0124  | >1    | >1     | 19.19                  | 1.68                                          |

**Table S3.**  $K_{off}$  kinetic parameters of 1, 5 and 14 (KT-531) with HDAC6.

| K-off kinetic parameter             | Compound 1 | Compound 5 | Compound 14 |
|-------------------------------------|------------|------------|-------------|
| $V_0$ ( $10^{-6}$ , % conversion/s) | 3.66       | 0          | 5.75        |
| Observed rate ( $\text{s}^{-1}$ )   | 0.00156    | 0.015163   | 0.000718    |
| Recovery (%)                        | 89.3       | 85.7       | 112.8       |
| Residence time (min)                | 10.716     | 1.0991     | 23.184      |

**Table S4.** Cytotoxicity of SAHA and belinostat in healthy non-cancerous cell lines (Normal Human Fibroblasts (NHF) and Human Umbilical Vein Endothelial Cells (HUVEC)).

| Compound   | Cellular IC <sub>50</sub> (μM) |       |
|------------|--------------------------------|-------|
|            | NHF                            | HUVEC |
| SAHA       | 4.54                           | 3.55  |
| Belinostat | 1.13                           | 0.60  |

**Table S5** Comparison of HDAC8 selective inhibitors (PCI-34051 and MMH-410) with **KT-531**.

| Compound           | <i>In vitro</i> IC <sub>50</sub> (μM) |         |         |        | <i>In cellulo</i> IC <sub>50</sub> (μM) |       |
|--------------------|---------------------------------------|---------|---------|--------|-----------------------------------------|-------|
|                    | HDAC3                                 | HDAC6   | HDAC8   | HDAC11 | MV4-11                                  | MRC-9 |
| <b>14 (KT-531)</b> | >1                                    | 0.00850 | 0.334   | >1     | 0.42                                    | >20   |
| PCI-34051          | >1                                    | >1      | 0.00403 | 0.482  | >50                                     | >50   |
| MMH-410            | >1                                    | >1      | 0.0655  | >1     | >50                                     | >50   |

### <sup>1</sup>H NMR spectra and Analytical HPLC traces

#### Compound 1

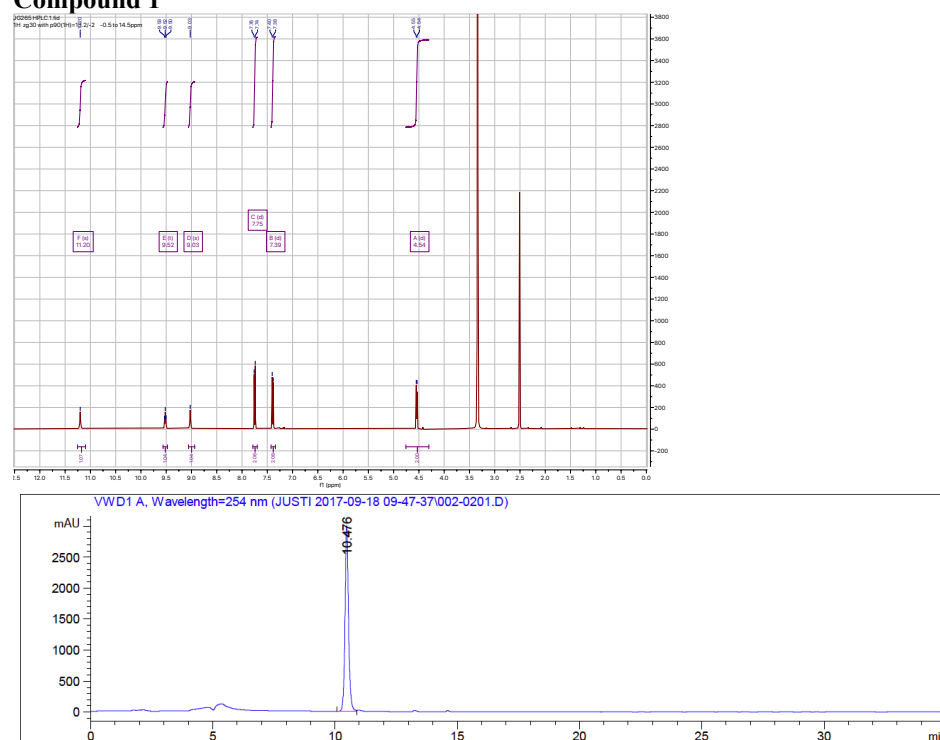

#### Compound 2

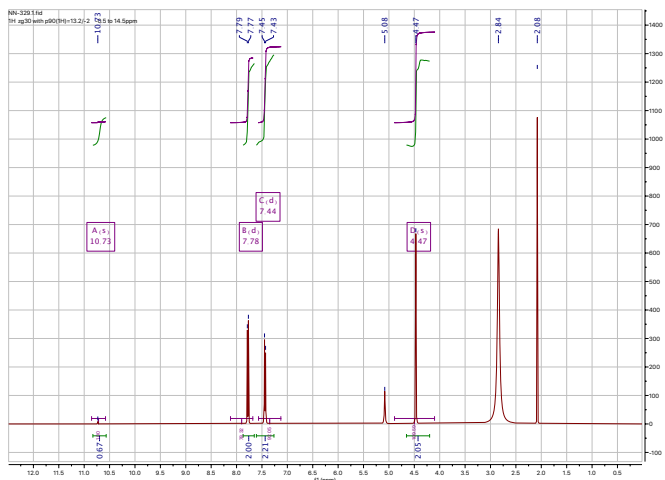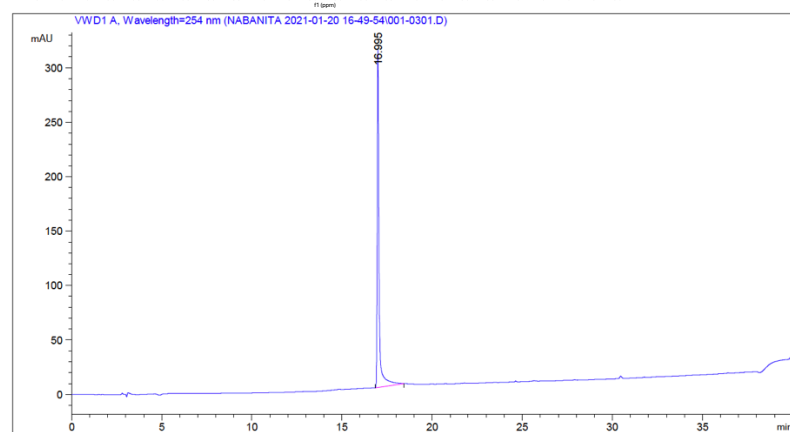

### Compound 3

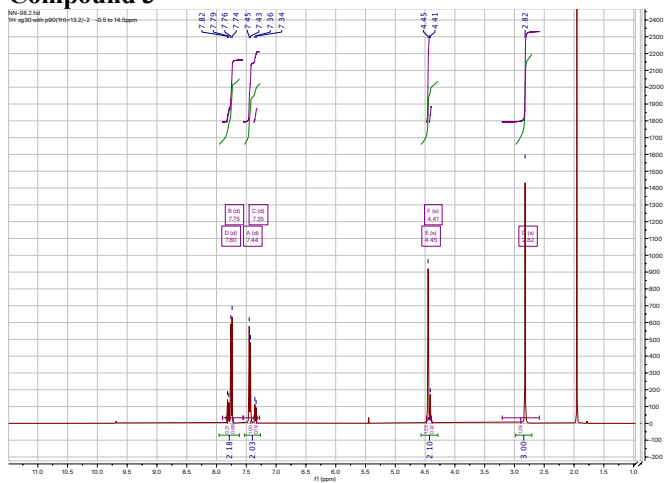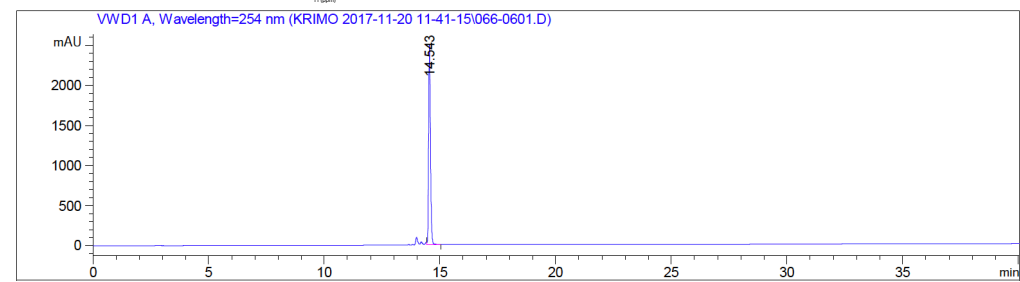

### Compound 4



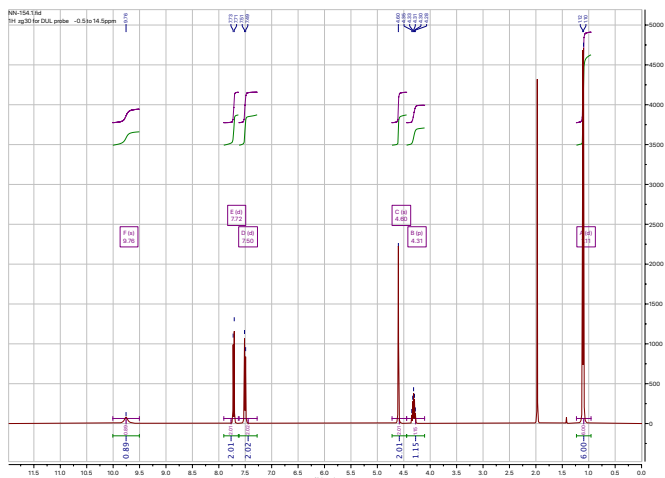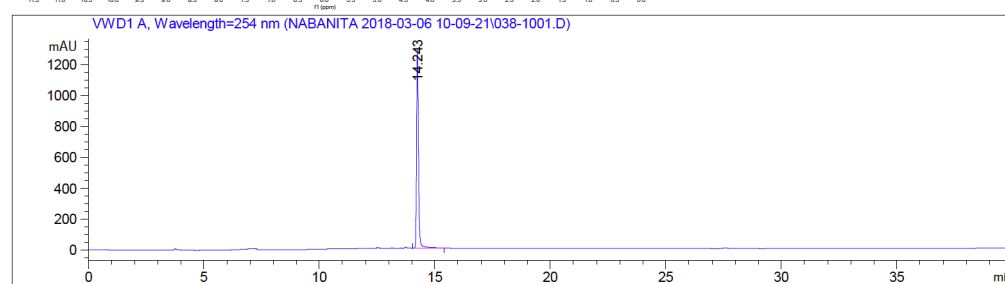

### Compound 5

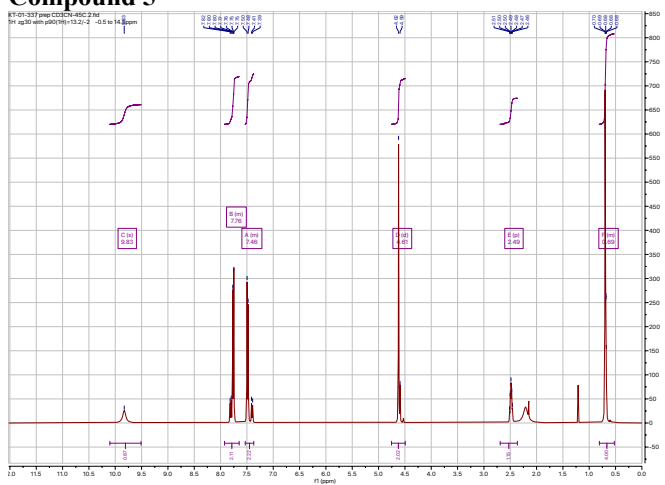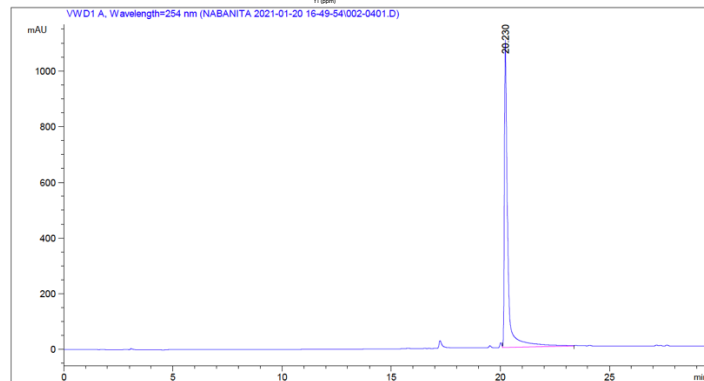

### Compound 6

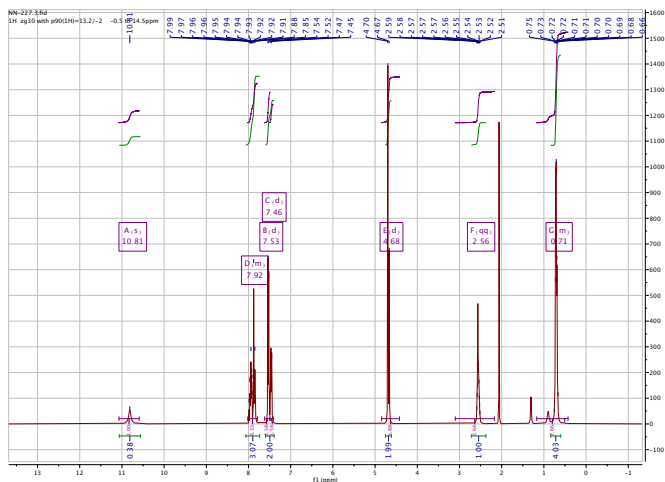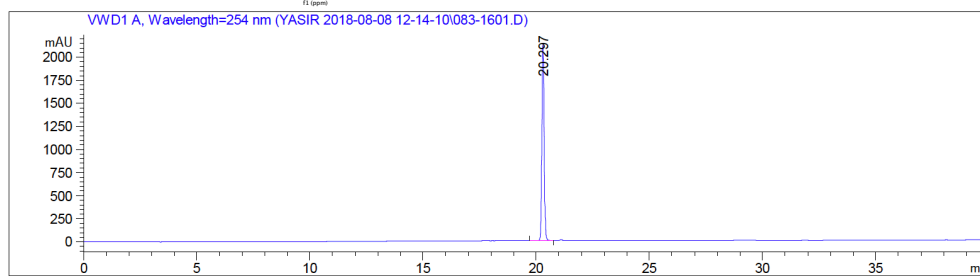

### Compound 7

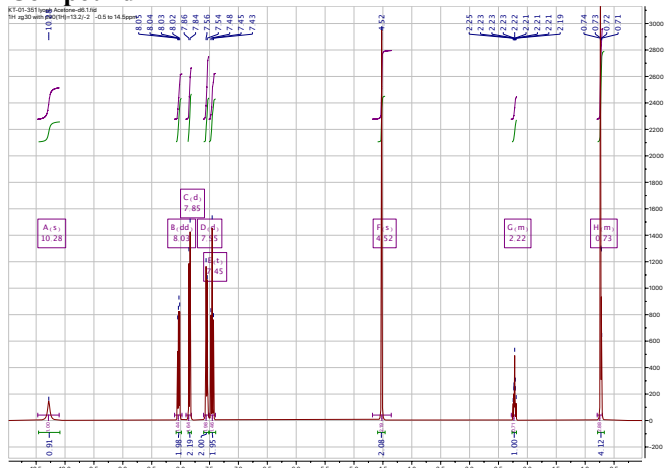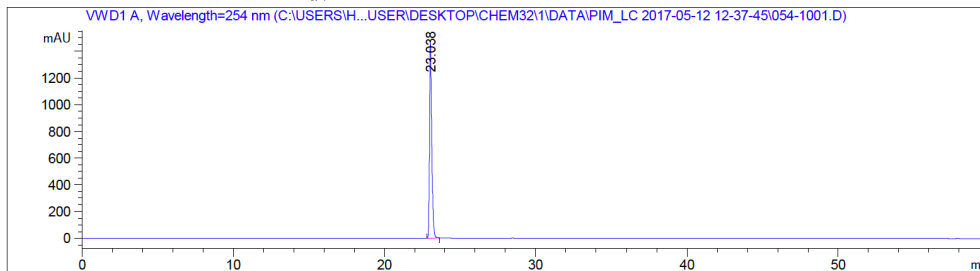

### Compound 8

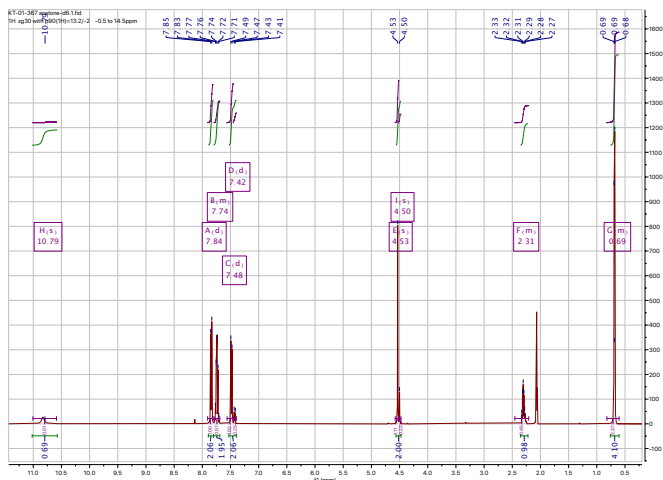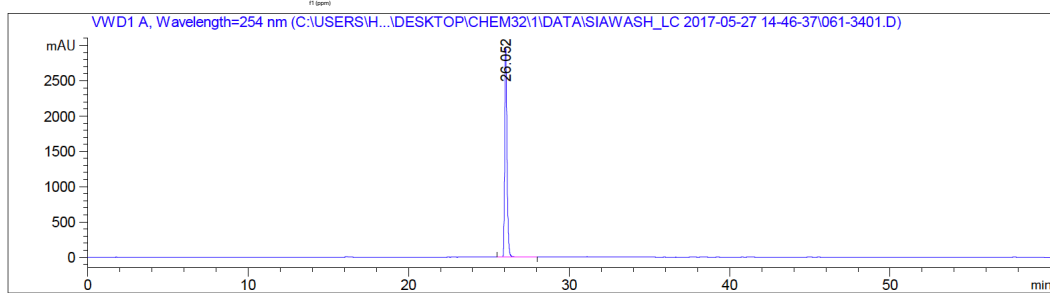

**Compound 9**

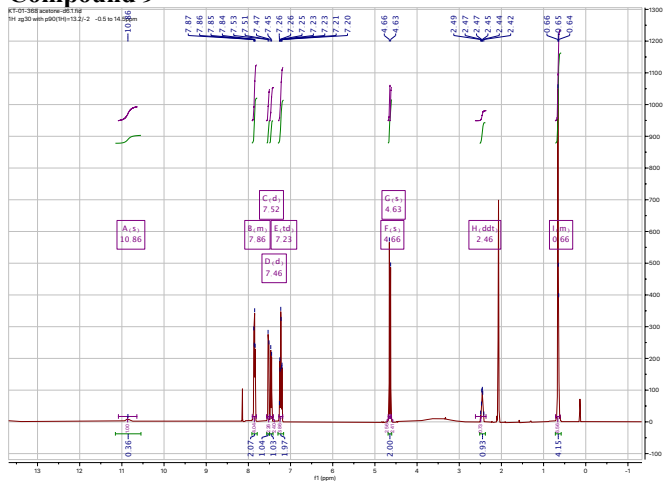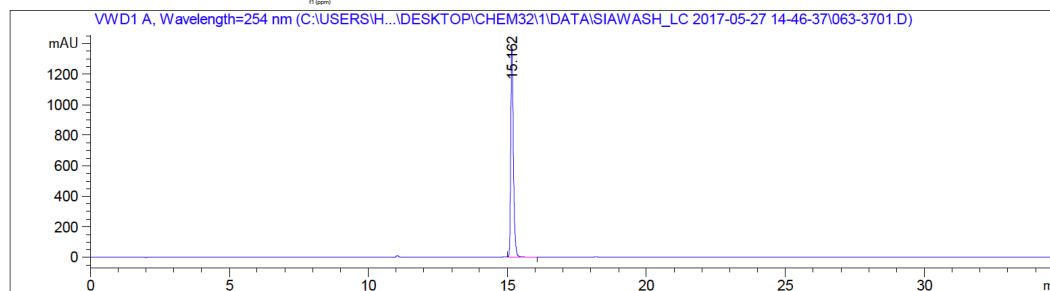

**Compound 10**

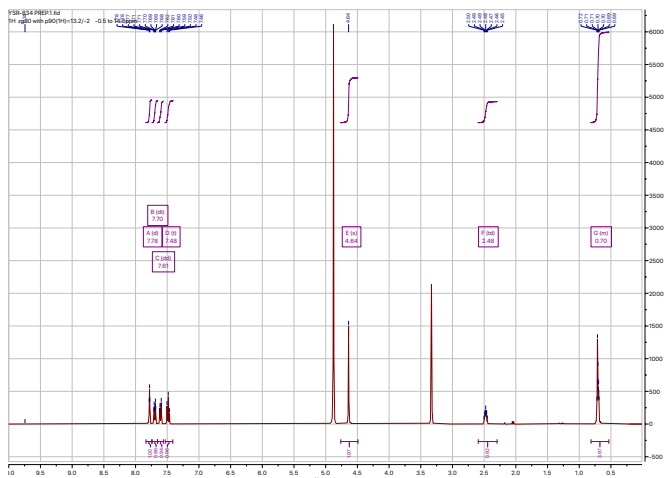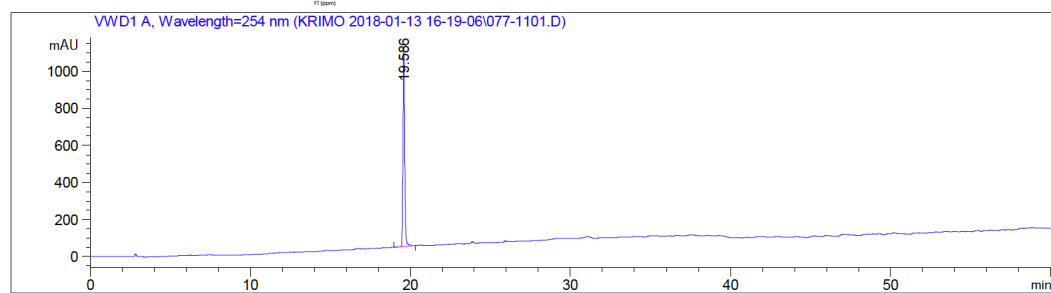

### Compound 11

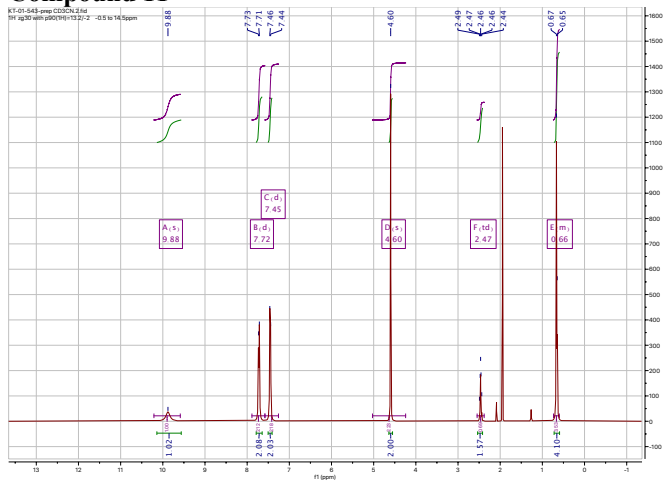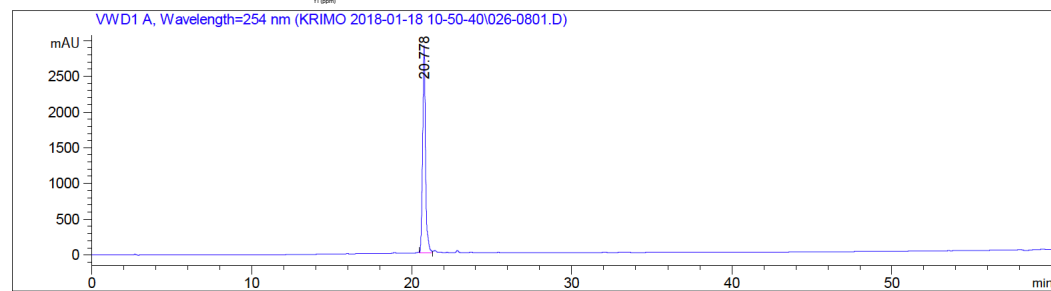

### Compound 12

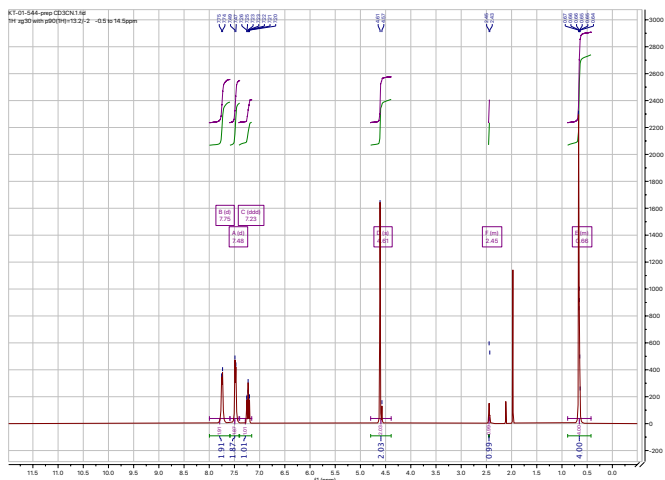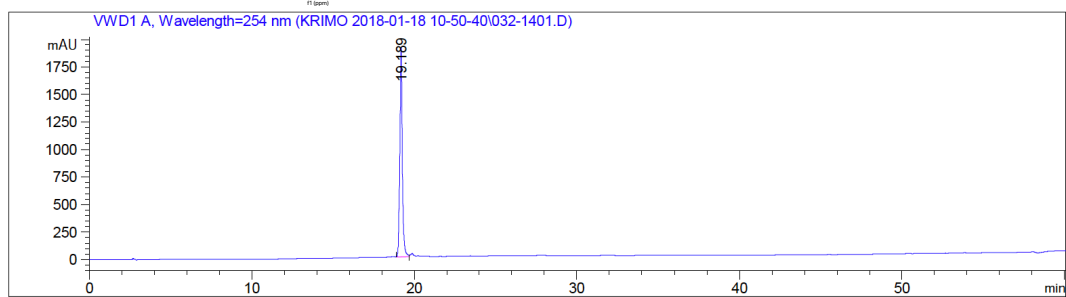

**Compound 13**

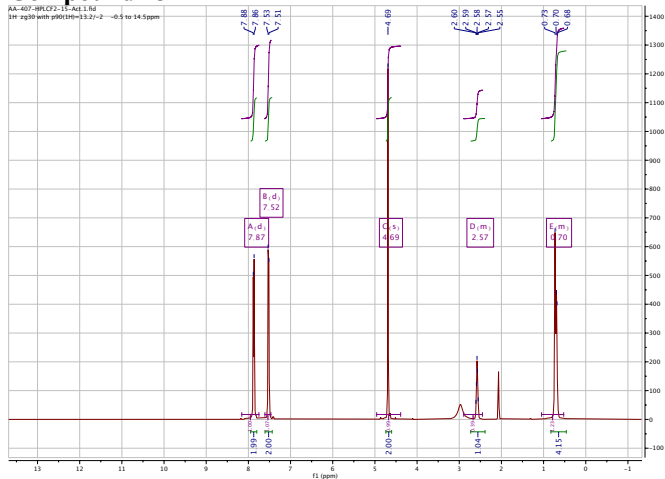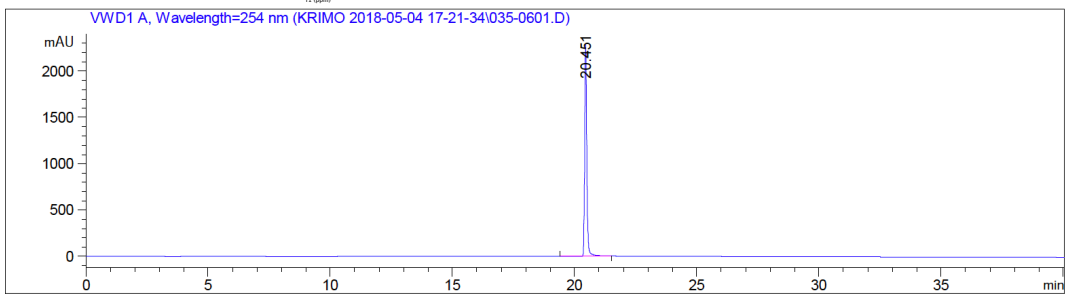

**Compound 14**

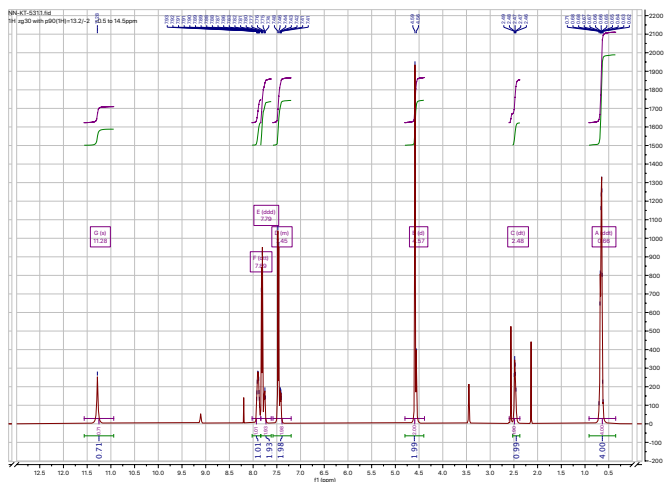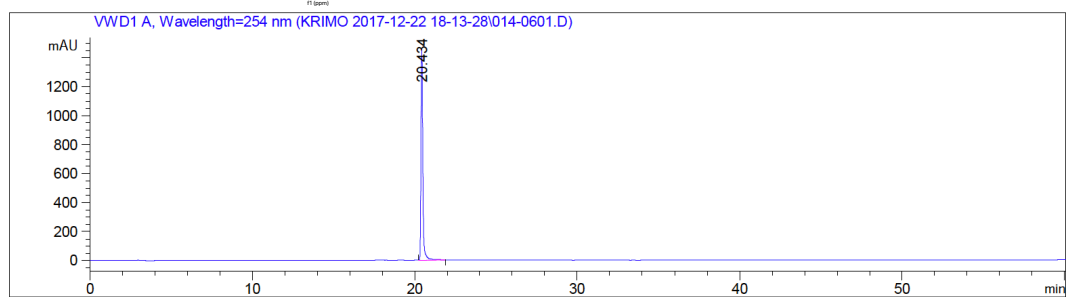

Supplement: jm1c00420_si_001.pdf [file jm1c00420_si_001.pdf]
